# Supplementary material
Source: MDPI journal article supplement (https://www.mdpi.com/2071-1050/13/17/9690)
Supplement: s1 [file s1]

Supplementary Materials

# Health Impact Attributable to Improvement of PM<sub>2.5</sub> Pollution from 2014–2018 and its Potential Benefits by 2030 in China

Yu Ma <sup>1,2</sup>, Deping Li <sup>1,2,\*</sup> and Liang Zhou <sup>1,2</sup>

<sup>1</sup> Hunan Key Laboratory of Geospatial Big Data Mining and Application, Hunan Normal University, Changsha 410081, China; mayu0411@hunnu.edu.cn (Y.M.); zhouliang@hunnu.edu.cn (L.Z.)

<sup>2</sup> School of Geographic Sciences, Hunan Normal University, Changsha 410081, China

\* Correspondence: lideping106@aliyun.com; Tel.: +86-130-5518-4008

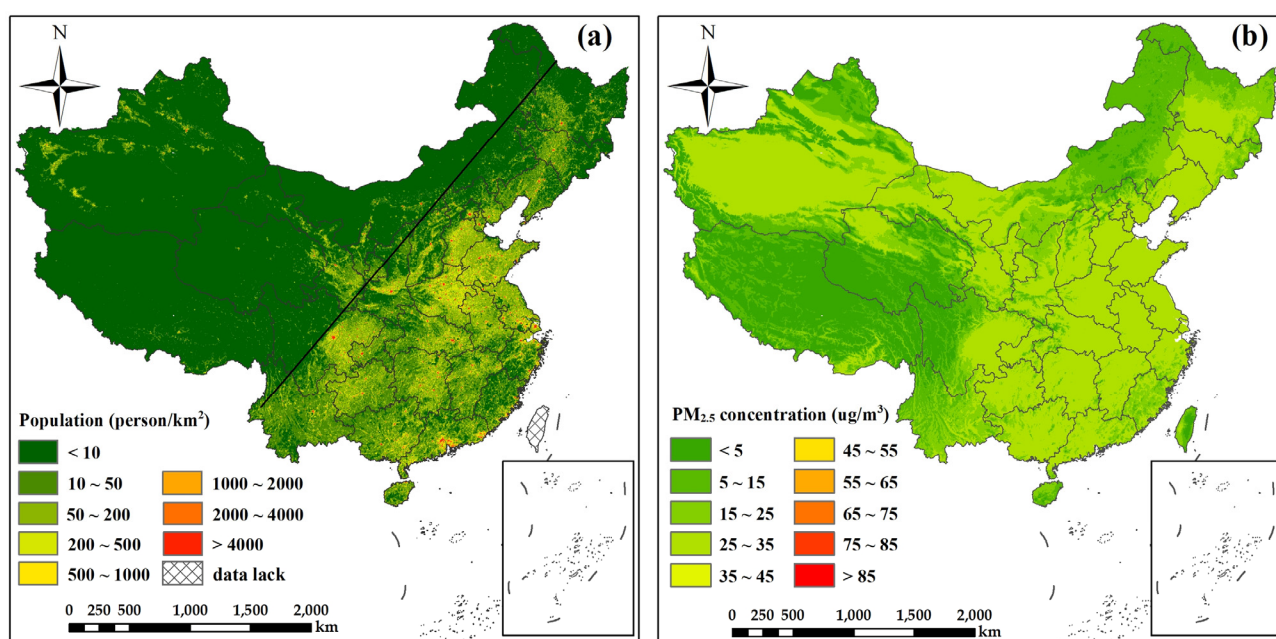

**Figure S1.** Spatial distribution of population density (a) and PM<sub>2.5</sub> concentration (b) across China in 2030. The northeast–southwest black line represents the ‘Heihe–Tengchong Line’.

**Table S1.** List of the cities and division basis of six major regions in China (see Figure S2).

| Region    | City list                                                                                                                                                                                                                                                                                                                                                                                                                                                                                         | Division basis                            |
|-----------|---------------------------------------------------------------------------------------------------------------------------------------------------------------------------------------------------------------------------------------------------------------------------------------------------------------------------------------------------------------------------------------------------------------------------------------------------------------------------------------------------|-------------------------------------------|
| BTHS (28) | 1. Beijing, 2.Tianjin, 3.Shijiazhuang, 4.Tangshan, 5.Handan, 6.Xingtai, 7.Baoding, 8.Cangzhou, 9.Langfang, 10.Hengshui, 11.Taiyuan, 12.Yangquan, 13.Changzhi, 14.Jincheng, 15.Jinan, 16.Zibo, 17.Jining, 18.Dezhou, 19.Liaocheng, 20.Binzhou, 21.Heze, 22.Zhengzhou, 23.Kaifeng, 24.Anyang, 25.Hebi, 26.Xinxiang, 27.Jiaozuo, 28.Puyang.                                                                                                                                                          | Three-year plan on defending the blue sky |
| YRD (41)  | 1.Shanghai, 2.Nanjing, 3.Wuxi, 4.Xuzhou, 5.Changzhou, 6.Suzhou, 7.Nantong, 8.Lianyungang, 9.Huai'an, 10.Yancheng, 11.Yangzhou, 12.Zhenjiang, 13.Taizhou, 14.Suqian, 15.Hangzhou, 16.Ningbo, 17.Wenzhou, 18.Shaoxing, 19.Huzhou, 20.Jiaxing, 21.Jinhua, 22.Quzhou, 23.Taizhou, 24.Lishui, 25.Zhoushan, 26.Hefei, 27.Wuhu, 28.Bengbu, 29.Huainan, 30.Ma'an Shan, 31.Huaibei, 32.Tongling, 33.Anqing, 34.Huangshan, 35.Fuyang, 36.Suzhou, 37.Chuzhou, 38.Lu'an, 39.Xuancheng, 40.Chizhou, 41.Bozhou. | National urban air quality report         |
| FWP (11)  | 1.Luliang, 2.Jinzhong, 3.Linfen, 4.Yuncheng, 5.Luoyang, 6.Sanmenxia, 7.Xi'an, 8.Xianyang, 9.Baoji, 10.Tongchuan, 11.Weinan.                                                                                                                                                                                                                                                                                                                                                                       | National urban air quality report         |
| CYR (16)  | 1.Chongqing, 2.Chengdu, 3.Zigong, 4.Luzhou, 5.Deyang, 6.Mianyang, 7.Suining, 8.Neijiang, 9.Leshan, 10.Meishan, 11.Yibin, 12.Ya'an, 13.Ziyang, 14.Nanchong, 15.Guang'an, 16.Dazhou.                                                                                                                                                                                                                                                                                                                | National urban air quality report         |
| TCC (22)  | 1.Wuhan, 2.Xianning, 3.Xiaogan, 4.Huanggang, 5.Huangshi, 6.Ezhou, 7.Xiangyang, 8.Yichang, 9.Jingmen, 10.Jingzhou, 11.Suizhou, 12.Nanchang, 13.Pingxiang, 14.Xinyu, 15.Yichun, 16.Jiujiang, 17.Changsha, 18.Zhuzhou, 19.Xiangtan, 20.Yueyang, 21.Changde, 22.Yiyang.                                                                                                                                                                                                                               | National urban air quality report         |
| PRD (9)   | 1.Guangzhou, 2.Shenzhen, 3.Zhuhai, 4.Foshan, 5.Jiangmen, 6.Zhaoqing, 7.Huizhou, 8.Dongguan, 9.Zhongshan.                                                                                                                                                                                                                                                                                                                                                                                          | National urban air quality report         |

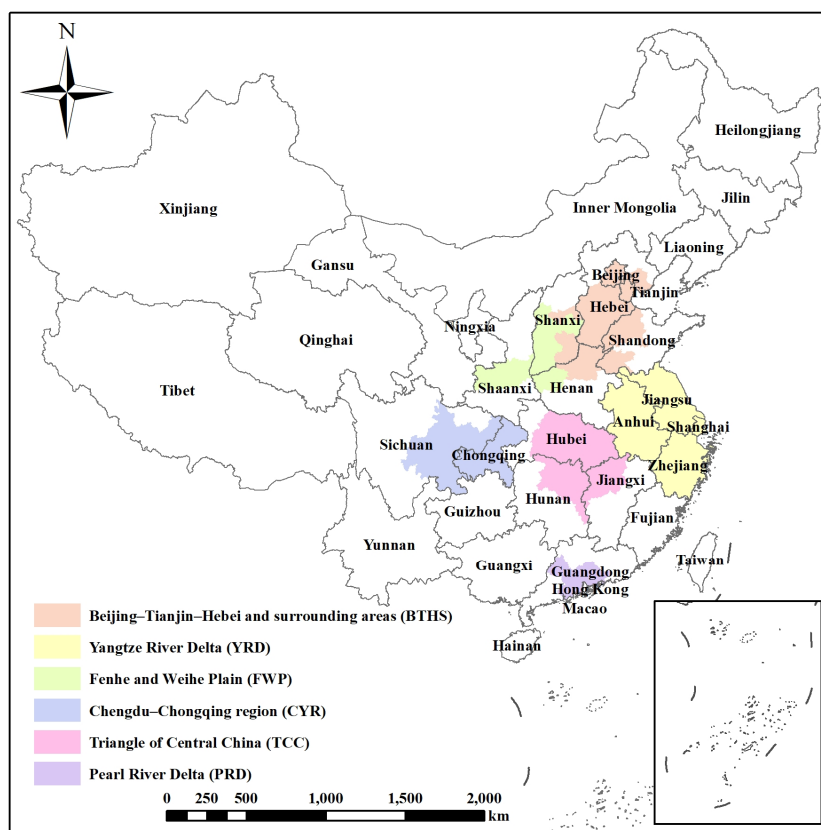

Figure S2. Geographical locations of Chinese provinces and the six major regions.

**Table S2.** Annual averaged PM<sub>2.5</sub> concentrations in 31 provinces of China from 2014–2018 and changes from 2014 to 2018.

| Province       | PM <sub>2.5</sub> concentration (µg/m <sup>3</sup> ) |       |       |       |       |           |
|----------------|------------------------------------------------------|-------|-------|-------|-------|-----------|
|                | 2014                                                 | 2015  | 2016  | 2017  | 2018  | 2018–2014 |
| Beijing        | 51.24                                                | 47.76 | 40.38 | 35.58 | 32.33 | −18.91    |
| Tianjin        | 77.69                                                | 67.66 | 62.56 | 54.74 | 48.29 | −29.40    |
| Hebei          | 54.25                                                | 49.27 | 43.36 | 39.99 | 35.15 | −19.09    |
| Shanxi         | 39.12                                                | 37.21 | 32.83 | 31.70 | 30.09 | −9.03     |
| Inner Mongolia | 16.17                                                | 16.29 | 13.57 | 13.83 | 14.95 | −1.22     |
| Liaoning       | 38.18                                                | 38.28 | 28.62 | 29.16 | 24.60 | −13.58    |
| Jilin          | 33.80                                                | 32.16 | 22.50 | 27.61 | 19.56 | −14.24    |
| Heilongjiang   | 23.91                                                | 20.63 | 13.87 | 18.96 | 14.19 | −9.71     |
| Shanghai       | 48.07                                                | 49.81 | 40.40 | 38.25 | 35.04 | −13.03    |
| Jiangsu        | 60.11                                                | 57.50 | 49.21 | 48.79 | 46.12 | −13.99    |
| Zhejiang       | 39.88                                                | 34.30 | 28.79 | 29.32 | 25.80 | −14.08    |
| Anhui          | 62.71                                                | 54.22 | 48.05 | 50.77 | 45.48 | −17.23    |
| Fujian         | 24.79                                                | 22.40 | 20.91 | 20.68 | 18.98 | −5.81     |
| Jiangxi        | 40.66                                                | 34.63 | 33.92 | 34.80 | 28.88 | −11.78    |
| Shandong       | 68.46                                                | 66.75 | 58.41 | 51.85 | 45.69 | −22.76    |
| Henan          | 68.77                                                | 64.79 | 57.45 | 53.96 | 51.28 | −17.50    |
| Hubei          | 51.64                                                | 46.20 | 41.49 | 39.75 | 35.42 | −16.22    |
| Hunan          | 49.46                                                | 41.93 | 38.32 | 35.61 | 32.08 | −17.38    |
| Guangdong      | 32.07                                                | 27.95 | 26.58 | 26.51 | 23.85 | −8.22     |
| Guangxi        | 35.96                                                | 31.63 | 28.99 | 28.00 | 26.08 | −9.88     |
| Hainan         | 14.17                                                | 14.00 | 13.80 | 13.71 | 14.19 | 0.02      |
| Chongqing      | 41.63                                                | 36.32 | 35.95 | 30.49 | 26.88 | −14.75    |
| Sichuan        | 24.05                                                | 19.38 | 19.76 | 17.59 | 15.98 | −8.08     |
| Guizhou        | 33.71                                                | 30.59 | 28.95 | 25.88 | 23.37 | −10.35    |
| Yunnan         | 18.92                                                | 17.41 | 18.01 | 14.95 | 15.21 | −3.71     |
| Tibet          | 6.18                                                 | 4.41  | 4.68  | 4.88  | 5.31  | −0.87     |
| Shaanxi        | 33.10                                                | 29.91 | 29.02 | 27.55 | 26.07 | −7.03     |
| Gansu          | 30.22                                                | 27.35 | 26.84 | 24.44 | 25.89 | −4.33     |
| Qinghai        | 13.92                                                | 9.47  | 8.70  | 9.75  | 12.26 | −1.66     |
| Ningxia        | 31.15                                                | 32.40 | 32.91 | 28.10 | 27.68 | −3.47     |
| Xinjiang       | 36.82                                                | 30.23 | 30.21 | 28.93 | 37.51 | 0.70      |

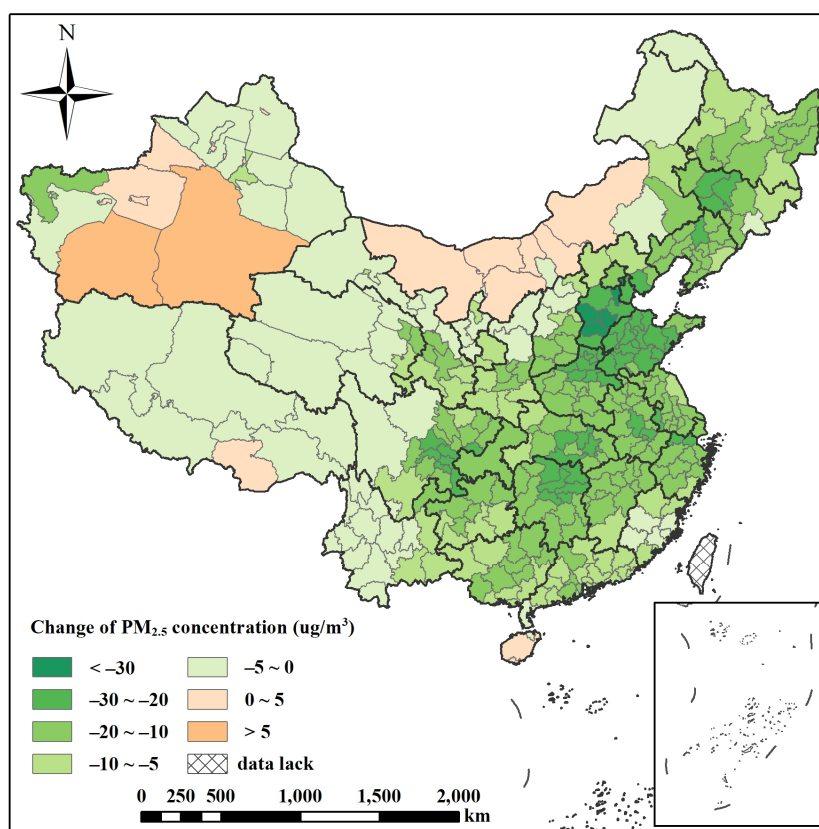

**Figure S3.** Changes of annual averaged  $PM_{2.5}$  concentrations in Chinese cities from 2014 to 2018.

**Table S3.** Premature mortality caused by PM<sub>2.5</sub> in Chinese cities from 2014–2030.

| Province       | City         | Premature deaths (person) |       |       |           |           |
|----------------|--------------|---------------------------|-------|-------|-----------|-----------|
|                |              | 2014                      | 2018  | 2030  | 2018–2014 | 2030–2018 |
| Beijing        | Beijing      | 34944                     | 26831 | 18174 | −8113     | −8657     |
| Tianjin        | Tianjin      | 24558                     | 18969 | 13814 | −5589     | −5155     |
| Hebei          | Shijiazhuang | 26075                     | 20772 | 16637 | −5303     | −4135     |
|                | Tangshan     | 16778                     | 12101 | 9998  | −4677     | −2103     |
|                | Qinhuangdao  | 5661                      | 4142  | 4295  | −1519     | 153       |
|                | Handan       | 22733                     | 18248 | 11856 | −4485     | −6392     |
|                | Xingtai      | 17956                     | 14140 | 7641  | −3816     | −6499     |
|                | Baoding      | 27479                     | 21430 | 13869 | −6049     | −7561     |
|                | Zhangjiakou  | 6163                      | 5163  | 4428  | −1000     | −735      |
|                | Chengde      | 5362                      | 3744  | 2401  | −1618     | −1343     |
|                | Cangzhou     | 16989                     | 13403 | 6245  | −3586     | −7158     |
|                | Langfang     | 10343                     | 7861  | 4322  | −2482     | −3539     |
|                | Hengshui     | 10804                     | 8481  | 3877  | −2323     | −4604     |
| Shanxi         | Taiyuan      | 8477                      | 7063  | 8220  | −1414     | 1157      |
|                | Datong       | 4970                      | 4174  | 4358  | −796      | 184       |
|                | Yangquan     | 2691                      | 2240  | 1504  | −451      | −736      |
|                | Changzhi     | 6531                      | 5096  | 3473  | −1435     | −1623     |
|                | Jincheng     | 4453                      | 3469  | 2415  | −984      | −1054     |
|                | Shuozhou     | 2702                      | 2302  | 1389  | −400      | −913      |
|                | Jinzhong     | 6376                      | 5228  | 3410  | −1148     | −1818     |
|                | Yuncheng     | 10503                     | 8674  | 4418  | −1829     | −4256     |
|                | Xinzhou      | 4985                      | 4267  | 2235  | −718      | −2032     |
|                | Linfen       | 8448                      | 7055  | 4418  | −1393     | −2637     |
| Inner Mongolia | Luliang      | 5886                      | 5051  | 3197  | −835      | −1854     |
|                | Hohhot       | 5397                      | 4489  | 5692  | −908      | 1203      |
|                | Baotou       | 5230                      | 4237  | 6375  | −993      | 2138      |
|                | Wuhai        | 917                       | 818   | 609   | −99       | −209      |
|                | Chifeng      | 5911                      | 4457  | 3699  | −1454     | −758      |
|                | Tongliao     | 4860                      | 3325  | 2894  | −1535     | −431      |
|                | Ordos        | 2672                      | 2472  | 1484  | −200      | −988      |
|                | Hulun Buir   | 3207                      | 2317  | 2152  | −890      | −165      |
|                | Bayan Nur    | 2516                      | 2322  | 1891  | −194      | −431      |
|                | Ulanqab      | 2608                      | 2226  | 1708  | −382      | −518      |
|                | Hinggan      | 2136                      | 1395  | 1163  | −741      | −232      |
|                | Xilingol     | 1043                      | 887   | 515   | −156      | −372      |
|                | Alxa         | 370                       | 348   | 111   | −22       | −237      |
| Liaoning       | Shenyang     | 18343                     | 13222 | 12159 | −5121     | −1063     |
|                | Dalian       | 12251                     | 8911  | 8503  | −3340     | −408      |
|                | Anshan       | 7782                      | 5807  | 4645  | −1975     | −1162     |

|              |               |       |       |       |       |       |
|--------------|---------------|-------|-------|-------|-------|-------|
|              | Fushun        | 4440  | 3431  | 2813  | −1009 | −618  |
|              | Benxi         | 3330  | 2439  | 2163  | −891  | −276  |
|              | Dandong       | 4019  | 3047  | 2449  | −972  | −598  |
|              | Jinzhou       | 6250  | 4778  | 2875  | −1472 | −1903 |
|              | Yingkou       | 4833  | 3733  | 2601  | −1100 | −1132 |
|              | Fuxin         | 3403  | 2567  | 1699  | −836  | −868  |
|              | Liaoyang      | 4186  | 3072  | 2076  | −1114 | −996  |
|              | Panjin        | 2778  | 2156  | 1684  | −622  | −472  |
|              | Tieling       | 5573  | 3925  | 2277  | −1648 | −1648 |
|              | Chaoyang      | 5059  | 3678  | 2465  | −1381 | −1213 |
|              | Huludao       | 4731  | 3589  | 2019  | −1142 | −1570 |
| Jilin        | Changchun     | 17547 | 11469 | 9886  | −6078 | −1583 |
|              | Jilin         | 8985  | 6238  | 5695  | −2747 | −543  |
|              | Siping        | 7193  | 4747  | 3401  | −2446 | −1346 |
|              | Liaoyuan      | 2465  | 1718  | 1257  | −747  | −461  |
|              | Tonghua       | 4475  | 3248  | 2637  | −1227 | −611  |
|              | Baishan       | 2038  | 1569  | 1386  | −469  | −183  |
|              | Songyuan      | 5702  | 3674  | 2588  | −2028 | −1086 |
|              | Baicheng      | 3225  | 2087  | 1886  | −1138 | −201  |
|              | Yanbian       | 3797  | 2733  | 2586  | −1064 | −147  |
| Heilongjiang | Harbin        | 24588 | 16917 | 15452 | −7671 | −1465 |
|              | Qiqihar       | 8309  | 5897  | 5249  | −2412 | −648  |
|              | Jixi          | 3342  | 2350  | 2188  | −992  | −162  |
|              | Hegang        | 1768  | 1249  | 1288  | −519  | 39    |
|              | Shuangyashan  | 2497  | 1639  | 1341  | −858  | −298  |
|              | Daqing        | 5603  | 3841  | 3056  | −1762 | −785  |
|              | Yichun        | 1978  | 1344  | 1023  | −634  | −321  |
|              | Jiamusi       | 4256  | 3043  | 2533  | −1213 | −510  |
|              | Qitaihe       | 1766  | 1272  | 1251  | −494  | −21   |
|              | Mudanjiang    | 5309  | 3589  | 3430  | −1720 | −159  |
|              | Heihe         | 2226  | 1628  | 1202  | −598  | −426  |
|              | Suihua        | 10861 | 7198  | 5194  | −3663 | −2004 |
|              | Daxing'anling | 363   | 282   | 136   | −81   | −146  |
| Shanghai     | Shanghai      | 21713 | 16792 | 13390 | −4921 | −3402 |
| Jiangsu      | Nanjing       | 12529 | 9394  | 8880  | −3135 | −514  |
|              | Wuxi          | 9649  | 7495  | 6547  | −2154 | −948  |
|              | Xuzhou        | 13547 | 11581 | 6293  | −1966 | −5288 |
|              | Changzhou     | 6998  | 5548  | 4140  | −1450 | −1408 |
|              | Suzhou        | 15308 | 11515 | 9267  | −3793 | −2248 |
|              | Nantong       | 9758  | 7778  | 5177  | −1980 | −2601 |
|              | Lianyungang   | 6394  | 5041  | 2615  | −1353 | −2426 |
|              | Huai'an       | 6962  | 5778  | 3482  | −1184 | −2296 |

|          |           |       |       |       |       |       |
|----------|-----------|-------|-------|-------|-------|-------|
|          | Yancheng  | 9813  | 8117  | 4246  | −1696 | −3871 |
|          | Yangzhou  | 6672  | 5503  | 3610  | −1169 | −1893 |
|          | Zhenjiang | 4739  | 3811  | 2710  | −928  | −1101 |
|          | Taizhou   | 6836  | 5515  | 3457  | −1321 | −2058 |
|          | Suqian    | 7059  | 5820  | 2900  | −1239 | −2920 |
| Zhejiang | Hangzhou  | 10633 | 7669  | 7289  | −2964 | −380  |
|          | Ningbo    | 7769  | 5770  | 5601  | −1999 | −169  |
|          | Wenzhou   | 8412  | 6140  | 8405  | −2272 | 2265  |
|          | Jiaxing   | 5504  | 3924  | 2661  | −1580 | −1263 |
|          | Huzhou    | 3565  | 2564  | 1637  | −1001 | −927  |
|          | Shaoxing  | 5709  | 4101  | 3504  | −1608 | −597  |
|          | Jinhua    | 6088  | 4358  | 3118  | −1730 | −1240 |
|          | Quzhou    | 2347  | 1685  | 762   | −662  | −923  |
|          | Zhoushan  | 757   | 566   | 474   | −191  | −92   |
|          | Taizhou   | 5623  | 4031  | 3779  | −1592 | −252  |
|          | Lishui    | 2046  | 1472  | 553   | −574  | −919  |
| Anhui    | Hefei     | 15328 | 12016 | 11830 | −3312 | −186  |
|          | Wuhu      | 6914  | 5391  | 4403  | −1523 | −988  |
|          | Bengbu    | 6462  | 5274  | 3799  | −1188 | −1475 |
|          | Huainan   | 4752  | 3680  | 3608  | −1072 | −72   |
|          | Ma'anshan | 4544  | 3566  | 2515  | −978  | −1051 |
|          | Huaibei   | 4261  | 3654  | 2706  | −607  | −948  |
|          | Tongling  | 1474  | 1058  | 1200  | −416  | 142   |
|          | Anqing    | 10153 | 7977  | 4737  | −2176 | −3240 |
|          | Huangshan | 2421  | 1731  | 1239  | −690  | −492  |
|          | Chuzhou   | 7744  | 6167  | 3243  | −1577 | −2924 |
|          | Fuyang    | 15778 | 12930 | 8513  | −2848 | −4417 |
|          | Suzhou    | 11011 | 9441  | 5188  | −1570 | −4253 |
|          | Lu'an     | 11158 | 8699  | 4414  | −2459 | −4285 |
|          | Bozhou    | 10138 | 8444  | 3978  | −1694 | −4466 |
|          | Chizhou   | 2606  | 2034  | 1118  | −572  | −916  |
|          | Xuancheng | 4797  | 3552  | 2114  | −1245 | −1438 |
| Fujian   | Fuzhou    | 7801  | 6267  | 8072  | −1534 | 1805  |
|          | Xiamen    | 3852  | 3118  | 5151  | −734  | 2033  |
|          | Putian    | 3070  | 2494  | 2432  | −576  | −62   |
|          | Sanming   | 2860  | 2279  | 1309  | −581  | −970  |
|          | Quanzhou  | 9292  | 7243  | 7811  | −2049 | 568   |
|          | Zhangzhou | 5847  | 4524  | 3501  | −1323 | −1023 |
|          | Nanping   | 3349  | 2505  | 1146  | −844  | −1359 |
|          | Longyan   | 2912  | 2355  | 1344  | −557  | −1011 |
|          | Ningde    | 2826  | 2186  | 1312  | −640  | −874  |
| Jiangxi  | Nanchang  | 8109  | 5691  | 8520  | −2418 | 2829  |



|          |              |       |       |       |       |       |
|----------|--------------|-------|-------|-------|-------|-------|
|          | Jingdezhen   | 2450  | 1776  | 1773  | −674  | −3    |
|          | Pingxiang    | 3041  | 2249  | 2369  | −792  | 120   |
|          | Jiujiang     | 7612  | 6072  | 4847  | −1540 | −1225 |
|          | Xinyu        | 1804  | 1403  | 1161  | −401  | −242  |
|          | Yingtian     | 1726  | 1313  | 1143  | −413  | −170  |
|          | Ganzhou      | 11065 | 9073  | 7095  | −1992 | −1978 |
|          | Ji'an        | 7433  | 5814  | 4136  | −1619 | −1678 |
|          | Yichun       | 8683  | 6557  | 4911  | −2126 | −1646 |
|          | Fuzhou       | 5742  | 4408  | 3636  | −1334 | −772  |
|          | Shangrao     | 10002 | 7434  | 6010  | −2568 | −1424 |
| Shandong | Jinan        | 15716 | 12345 | 11055 | −3371 | −1290 |
|          | Qingdao      | 16729 | 12328 | 12883 | −4401 | 555   |
|          | Zibo         | 10081 | 7937  | 6311  | −2144 | −1626 |
|          | Zaozhuang    | 8461  | 6853  | 4427  | −1608 | −2426 |
|          | Dongying     | 4384  | 3356  | 2060  | −1028 | −1296 |
|          | Yantai       | 12384 | 8727  | 7011  | −3657 | −1716 |
|          | Weifang      | 19799 | 15250 | 10347 | −4549 | −4903 |
|          | Jining       | 18727 | 14950 | 9216  | −3777 | −5734 |
|          | Taian        | 12765 | 9980  | 6402  | −2785 | −3578 |
|          | Weihai       | 4346  | 2941  | 2202  | −1405 | −739  |
|          | Rizhao       | 5764  | 4344  | 2561  | −1420 | −1783 |
|          | Laiwu        | 3132  | 2273  | 1622  | −859  | −651  |
|          | Linyi        | 22235 | 17255 | 10311 | −4980 | −6944 |
|          | Dezhou       | 13203 | 10186 | 5078  | −3017 | −5108 |
|          | Liaocheng    | 13921 | 11176 | 5351  | −2745 | −5825 |
|          | Binzhou      | 8252  | 6375  | 3360  | −1877 | −3015 |
|          | Heze         | 19435 | 16018 | 7318  | −3417 | −8700 |
| Henan    | Zhengzhou    | 21643 | 17372 | 18012 | −4271 | 640   |
|          | Kaifeng      | 11646 | 9638  | 5672  | −2008 | −3966 |
|          | Luoyang      | 14965 | 12401 | 9515  | −2564 | −2886 |
|          | Pingdingshan | 11781 | 9746  | 6771  | −2035 | −2975 |
|          | Anyang       | 13265 | 10700 | 7081  | −2565 | −3619 |
|          | Hebi         | 3961  | 3228  | 2294  | −733  | −934  |
|          | Xinxiang     | 14370 | 11855 | 7805  | −2515 | −4050 |
|          | Jiaozuo      | 10501 | 8671  | 6480  | −1830 | −2191 |
|          | Puyang       | 8881  | 7357  | 4446  | −1524 | −2911 |
|          | Xuchang      | 10597 | 8704  | 5566  | −1893 | −3138 |
|          | Luohe        | 6244  | 5225  | 3726  | −1019 | −1499 |
|          | Sanmenxia    | 4918  | 4091  | 2591  | −827  | −1500 |
|          | Nanyang      | 23750 | 19772 | 11077 | −3978 | −8695 |
|          | Shangqiu     | 18125 | 14933 | 8002  | −3192 | −6931 |
|          | Xinyang      | 13949 | 11274 | 5741  | −2675 | −5533 |

|           |                                |       |       |       |       |       |
|-----------|--------------------------------|-------|-------|-------|-------|-------|
|           | Zhoukou                        | 21680 | 17865 | 10241 | −3815 | −7624 |
|           | Zhumadian                      | 17030 | 14228 | 7539  | −2802 | −6689 |
| Hubei     | Wuhan                          | 20155 | 14726 | 15971 | −5429 | 1245  |
|           | Huangshi                       | 4391  | 3400  | 2891  | −991  | −509  |
|           | Shiyan                         | 5398  | 4269  | 3012  | −1129 | −1257 |
|           | Yichang                        | 7527  | 5621  | 3924  | −1906 | −1697 |
|           | Xiangfan                       | 10465 | 8536  | 5040  | −1929 | −3496 |
|           | Ezhou                          | 1966  | 1522  | 1244  | −444  | −278  |
|           | Jingmen                        | 5759  | 4311  | 2093  | −1448 | −2218 |
|           | Xiaogan                        | 9548  | 7333  | 5010  | −2215 | −2323 |
|           | jingzhou                       | 11404 | 8619  | 5341  | −2785 | −3278 |
|           | Huanggang                      | 11003 | 8624  | 5372  | −2379 | −3252 |
|           | Xianning                       | 4543  | 3411  | 2306  | −1132 | −1105 |
|           | Suizhou                        | 4122  | 3229  | 1618  | −893  | −1611 |
|           | Enshi                          | 4260  | 3214  | 2173  | −1046 | −1041 |
|           | Provincial-controlled division | 7245  | 5611  | 3364  | −1634 | −2247 |
| Hunan     | Changsha                       | 13596 | 10048 | 10645 | −3548 | 597   |
|           | Zhuzhou                        | 6932  | 5209  | 4966  | −1723 | −243  |
|           | Xiangtan                       | 5271  | 3907  | 3470  | −1364 | −437  |
|           | Hengyang                       | 12726 | 9662  | 7831  | −3064 | −1831 |
|           | Shaoyang                       | 12380 | 9152  | 6976  | −3228 | −2176 |
|           | Yueyang                        | 10229 | 7687  | 5815  | −2542 | −1872 |
|           | Changde                        | 10792 | 7914  | 5556  | −2878 | −2358 |
|           | Zhangjiajie                    | 2351  | 1753  | 1056  | −598  | −697  |
|           | Yiyang                         | 8037  | 5664  | 4217  | −2373 | −1447 |
|           | Chenzhou                       | 7250  | 5532  | 3997  | −1718 | −1535 |
|           | Yongzhou                       | 9024  | 6944  | 4134  | −2080 | −2810 |
|           | Huaihua                        | 7797  | 5702  | 3968  | −2095 | −1734 |
|           | Loudi                          | 6931  | 4991  | 4207  | −1940 | −784  |
|           | Xiangxi                        | 3733  | 2724  | 1762  | −1009 | −962  |
| Guangdong | Guangzhou                      | 18897 | 14895 | 21898 | −4002 | 7003  |
|           | Shaoguan                       | 3999  | 3216  | 1960  | −783  | −1256 |
|           | Shenzhen                       | 12802 | 10263 | 15461 | −2539 | 5198  |
|           | Zhuhai                         | 1948  | 1534  | 1438  | −414  | −96   |
|           | Shantou                        | 6663  | 5281  | 7545  | −1382 | 2264  |
|           | Foshan                         | 10267 | 8207  | 9884  | −2060 | 1677  |
|           | Jiangmen                       | 6455  | 4986  | 3955  | −1469 | −1031 |
|           | Zhanjiang                      | 7739  | 6445  | 4361  | −1294 | −2084 |
|           | Maoming                        | 7285  | 5749  | 3593  | −1536 | −2156 |
|           | Zhaoqing                       | 5657  | 4472  | 3008  | −1185 | −1464 |
|           | Huizhou                        | 5990  | 4619  | 3204  | −1371 | −1415 |

|           |                                |       |       |       |        |       |
|-----------|--------------------------------|-------|-------|-------|--------|-------|
|           | Meizhou                        | 5151  | 4096  | 2219  | −1055  | −1877 |
|           | Shanwei                        | 3349  | 2619  | 1994  | −730   | −625  |
|           | Heyuan                         | 3684  | 2861  | 1036  | −823   | −1825 |
|           | Yangjiang                      | 3202  | 2521  | 1615  | −681   | −906  |
|           | Qingyuan                       | 5329  | 4224  | 1695  | −1105  | −2529 |
|           | Dongguan                       | 11342 | 9372  | 9819  | −1970  | 447   |
|           | Zhongshan                      | 4381  | 3312  | 3082  | −1069  | −230  |
|           | Chaozhou                       | 3487  | 2679  | 2752  | −808   | 73    |
|           | Jieyang                        | 7524  | 5960  | 5584  | −1564  | −376  |
|           | Yunfu                          | 3270  | 2627  | 966   | −643   | −1661 |
| Guangxi   | Nanning                        | 12507 | 9473  | 13504 | −3034  | 4031  |
|           | Liuzhou                        | 7603  | 5768  | 6712  | −1835  | 944   |
|           | Guilin                         | 9477  | 7291  | 6619  | −2186  | −672  |
|           | Wuzhou                         | 5161  | 4010  | 4229  | −1151  | 219   |
|           | Beihai                         | 2462  | 1971  | 2666  | −491   | 695   |
|           | Fangchenggang                  | 1359  | 1045  | 997   | −314   | −48   |
|           | Qinzhou                        | 5332  | 4236  | 3566  | −1096  | −670  |
|           | Guigang                        | 7803  | 6010  | 5471  | −1793  | −539  |
|           | Yulin                          | 9644  | 7602  | 7445  | −2042  | −157  |
|           | Baise                          | 5332  | 4164  | 2909  | −1168  | −1255 |
|           | Hezhou                         | 3817  | 2917  | 2102  | −900   | −815  |
|           | Hechi                          | 5476  | 4130  | 2790  | −1346  | −1340 |
|           | Laibin                         | 4043  | 3012  | 1986  | −1031  | −1026 |
|           | Chongzuo                       | 3508  | 2618  | 1713  | −890   | −905  |
| Hainan    | Haikou                         | 1482  | 1239  | 2270  | −243   | 1031  |
|           | Sanya                          | 474   | 433   | 618   | −41    | 185   |
|           | Provincial-controlled division | 4100  | 3761  | 2507  | −339   | −1254 |
| Chongqing | Chongqing                      | 51111 | 36429 | 29861 | −14682 | −6568 |
| Sichuan   | Chengdu                        | 29083 | 22083 | 21808 | −7000  | −275  |
|           | Zigong                         | 5701  | 4051  | 2934  | −1650  | −1117 |
|           | Panzhihua                      | 1596  | 1414  | 1126  | −182   | −288  |
|           | Luzhou                         | 8037  | 5646  | 3797  | −2391  | −1849 |
|           | Deyang                         | 6883  | 5326  | 4042  | −1557  | −1284 |
|           | Mianyang                       | 7973  | 6131  | 4495  | −1842  | −1636 |
|           | Guangyuan                      | 3784  | 2917  | 1745  | −867   | −1172 |
|           | Suining                        | 6125  | 4486  | 3692  | −1639  | −794  |
|           | Neijiang                       | 7494  | 5344  | 4083  | −2150  | −1261 |
|           | Leshan                         | 6484  | 4736  | 3066  | −1748  | −1670 |
|           | Nanchong                       | 11112 | 8278  | 6368  | −2834  | −1910 |
|           | Meishan                        | 6161  | 4338  | 2765  | −1823  | −1573 |
|           | Yibin                          | 8852  | 6694  | 3746  | −2158  | −2948 |

|         |               |       |       |       |       |       |
|---------|---------------|-------|-------|-------|-------|-------|
|         | Guang'an      | 5934  | 4511  | 3289  | −1423 | −1222 |
|         | Dazhou        | 9421  | 7126  | 5312  | −2295 | −1814 |
|         | Ya'an         | 2714  | 2025  | 1099  | −689  | −926  |
|         | Bazhong       | 5102  | 3895  | 2294  | −1207 | −1601 |
|         | Ziyang        | 7249  | 5101  | 3312  | −2148 | −1789 |
|         | Aba           | 787   | 550   | 313   | −237  | −237  |
|         | Ganzi         | 668   | 487   | 203   | −181  | −284  |
|         | Liangshan     | 5218  | 3608  | 2183  | −1610 | −1425 |
| Guizhou | Guiyang       | 8748  | 6450  | 11712 | −2298 | 5262  |
|         | Liupanshui    | 5116  | 3895  | 4244  | −1221 | 349   |
|         | Zunyi         | 12458 | 8514  | 9879  | −3944 | 1365  |
|         | Anshun        | 4359  | 3194  | 3575  | −1165 | 381   |
|         | Tongren       | 5986  | 4167  | 3838  | −1819 | −329  |
|         | Qianxinan     | 4639  | 3453  | 3075  | −1186 | −378  |
|         | Bijie         | 12226 | 8523  | 8070  | −3703 | −453  |
|         | Qiandongnan   | 6474  | 4860  | 4068  | −1614 | −792  |
|         | Qiannan       | 5601  | 4263  | 3776  | −1338 | −487  |
| Yunnan  | Kunming       | 8715  | 7127  | 12185 | −1588 | 5058  |
|         | Qujing        | 7413  | 5705  | 5549  | −1708 | −156  |
|         | Yuxi          | 3012  | 2506  | 2690  | −506  | 184   |
|         | Baoshan       | 2564  | 2223  | 1975  | −341  | −248  |
|         | zhaotong      | 7453  | 5122  | 4951  | −2331 | −171  |
|         | Lijiang       | 1286  | 1058  | 832   | −228  | −226  |
|         | Simao         | 2860  | 2415  | 1717  | −445  | −698  |
|         | Lincang       | 2645  | 2286  | 1663  | −359  | −623  |
|         | Chuxiong      | 2805  | 2324  | 1961  | −481  | −363  |
|         | Honghe        | 5906  | 4537  | 4340  | −1369 | −197  |
|         | Wenshan       | 3990  | 2917  | 2117  | −1073 | −800  |
|         | Xishuangbanna | 1417  | 1175  | 797   | −242  | −378  |
|         | Dali          | 3487  | 2873  | 2629  | −614  | −244  |
|         | Dehong        | 1420  | 1237  | 888   | −183  | −349  |
|         | Nujiang       | 462   | 390   | 272   | −72   | −118  |
|         | Diqing        | 341   | 264   | 119   | −77   | −145  |
| Tibet   | Lhasa         | 552   | 397   | 723   | −155  | 326   |
|         | Qamdo         | 378   | 274   | 166   | −104  | −108  |
|         | Lhoka         | 1200  | 1197  | 623   | −3    | −574  |
|         | Shigatse      | 496   | 389   | 335   | −107  | −54   |
|         | Naqu          | 143   | 107   | 56    | −36   | −51   |
|         | Ngari         | 66    | 53    | 26    | −13   | −27   |
|         | Nyingchi      | 609   | 505   | 221   | −104  | −284  |
| Shaanxi | Xi'an         | 17489 | 15281 | 14984 | −2208 | −297  |
|         | Tongchuan     | 1352  | 1024  | 1025  | −328  | 1     |

|          |            |       |      |      |       |       |
|----------|------------|-------|------|------|-------|-------|
|          | Baoji      | 6847  | 5760 | 4151 | −1087 | −1609 |
|          | Xianyang   | 9830  | 8088 | 5673 | −1742 | −2415 |
|          | Weinan     | 10455 | 8679 | 4484 | −1776 | −4195 |
|          | Yan'an     | 2800  | 2394 | 1138 | −406  | −1256 |
|          | Hanzhong   | 5823  | 4722 | 3139 | −1101 | −1583 |
|          | Yulin      | 3861  | 3473 | 1595 | −388  | −1878 |
|          | Ankang     | 4303  | 3468 | 1781 | −835  | −1687 |
|          | Shangluo   | 3620  | 2976 | 1298 | −644  | −1678 |
| Gansu    | Lanzhou    | 6959  | 5563 | 7488 | −1396 | 1925  |
|          | Jiayuguan  | 387   | 308  | 344  | −79   | 36    |
|          | Jinchang   | 686   | 555  | 467  | −131  | −88   |
|          | Baiyin     | 2828  | 2348 | 1740 | −480  | −608  |
|          | Tianshui   | 5507  | 4271 | 3841 | −1236 | −430  |
|          | Wuwei      | 2735  | 2235 | 1491 | −500  | −744  |
|          | Zhangye    | 1837  | 1474 | 1147 | −363  | −327  |
|          | Pingliang  | 3168  | 2579 | 2152 | −589  | −427  |
|          | Jiuquan    | 1751  | 1472 | 909  | −279  | −563  |
|          | Qingyang   | 3067  | 2437 | 1854 | −630  | −583  |
|          | Dingxi     | 4640  | 3627 | 2537 | −1013 | −1090 |
|          | Longnan    | 3728  | 2727 | 1943 | −1001 | −784  |
|          | Linxia     | 3781  | 2848 | 2037 | −933  | −811  |
|          | Gannan     | 921   | 654  | 440  | −267  | −214  |
| Qinghai  | Xining     | 4932  | 3737 | 4818 | −1195 | 1081  |
|          | Haidong    | 2971  | 2315 | 1315 | −656  | −1000 |
|          | Haibei     | 428   | 334  | 164  | −94   | −170  |
|          | Huangnan   | 415   | 299  | 159  | −116  | −140  |
|          | Hainan     | 626   | 467  | 246  | −159  | −221  |
|          | Guoluo     | 130   | 108  | 32   | −22   | −76   |
|          | Yushu      | 281   | 207  | 80   | −74   | −127  |
|          | Haixi      | 795   | 667  | 435  | −128  | −232  |
| Ningxia  | Yinchuan   | 3523  | 2901 | 3621 | −622  | 720   |
|          | Shizuishan | 1219  | 1021 | 1113 | −198  | 92    |
|          | Wuzhong    | 2086  | 1719 | 1310 | −367  | −409  |
|          | Guyuan     | 1656  | 1429 | 1020 | −227  | −409  |
|          | Zhongwei   | 1768  | 1547 | 1037 | −221  | −510  |
| Xinjiang | Urumqi     | 8285  | 7100 | 9086 | −1185 | 1986  |
|          | Karamay    | 691   | 542  | 492  | −149  | −50   |
|          | Turpan     | 1556  | 1334 | 814  | −222  | −520  |
|          | Hami       | 1094  | 941  | 911  | −153  | −30   |
|          | Changji    | 2944  | 2516 | 2399 | −428  | −117  |
|          | Bortala    | 878   | 795  | 522  | −83   | −273  |
|          | Bayingol   | 3088  | 2757 | 2043 | −331  | −714  |

---

|                                |       |      |      |       |       |
|--------------------------------|-------|------|------|-------|-------|
| Aksu                           | 5907  | 5452 | 3289 | −455  | −2163 |
| Kizilsu                        | 1467  | 1213 | 777  | −254  | −436  |
| Kashgar                        | 10803 | 9462 | 6051 | −1341 | −3411 |
| Hotan                          | 5025  | 4847 | 2581 | −178  | −2266 |
| Ili                            | 4952  | 4359 | 3571 | −593  | −788  |
| Tarbagatay                     | 1961  | 1793 | 1161 | −168  | −632  |
| Altay                          | 747   | 575  | 428  | −172  | −147  |
| Provincial-controlled division | 1843  | 1413 | 1547 | −430  | 134   |

---

\* The background color of the table represents the region to which a city belongs, and the correspondence between color and region is shown in Figure S2.
